# Supplementary material for: The SMART-OR Framework for Implementing Artificial Intelligence in the Operating Room
Source: Research Square preprint supplement (doi:10.21203/rs.3.rs-8338990/v1), 2025-12-23
Supplement: Supplementary file 1 [file fd19975284438611f4ccbb93.docx]

**The SMART-OR Framework for Implementing Artificial Intelligence in the Operating Room**

**Supplementary Material Table of Content**

| **Table of Content** | **Page Number** |
| --- | --- |
| Phase I Interview Guide | 1 |
| Phase II Interview Guide | 3 |

**Phase I Interview Guide**

1. Demographics: Can you share your profession and the number of years you have been in your profession?
2. When do you feel this technology would be most useful?
   1. Follow-up prompts to discuss clinical contexts, types of patients, stage of career, practice setting
3. How do you see yourself using this technology?
   1. Follow-up prompts to discuss whether they would prefer a display that can be turned on/off, if the technology should be setup for every case, what clinical applications might be most useful, at what stages of an operation
4. Do you think this technology could impact patient outcomes?
5. What information would help you interpret this display?
   1. Follow-up prompts about heatmaps, confidence intervals, explainability
   2. Follow-up prompts for discussion around trust and bias in AI
6. What is your impression of the display?
   1. Follow-up prompts for quality, lag, ability to turn on/off
   2. Follow-up prompts about additional sensory input (audio, tactile)
7. What should be kept in mind when designing the physical setup?
   1. Follow-up for ergonomics, ease of setup, flow of OR
8. What features would help to adapt this to your clinical context and others?
   1. Follow-up prompts about physical space, features of technology, training information
9. What barriers exist to using this technology?
   1. Follow-up prompts for discussions around lack of understanding, trust, culture
10. What would encourage you to use this technology?
    1. Follow-up prompts about organizational factors, evidence, knowledge base

** Questions 2-6, surgeons and surgical trainees only

**Phase II Interview Guide**

1. What is your initial reaction to this technology?
2. How would you feel about your surgeon using this technology for your operation?
   1. Follow-up prompt for differing opinions
3. What are the benefits of this technology?
4. What are the risks of this technology?
   1. Follow-up: What might mitigate those risks?
5. Would you want to be informed/provide consent prior to this technology being used? Why?
   1. Follow-up: If yes, what is different about this technology from others that don’t require explicit consent (i.e. navigation systems, different staplers, or other equipment).
